# Supplementary material for: On the sensitivity of aerosol-cloud interactions to changes in sea surface temperature in radiative-convective equilibrium
Source: Copernicus journal article supplement (doi:10.5194/egusphere-2023-2096), 2023-10-04
Supplement: Supplementary file 1 [file egusphere-2023-2096-supplement.pdf]

# **Supporting information for: "On the sensitivity of aerosol-cloud interactions to changes in sea surface temperature in radiative-convective equilibrium"**

Suf Lorian<sup>1,2</sup> and Guy Dagan<sup>1</sup>

<sup>1</sup>Fredy and Nadine Herrmann Institute of Earth Sciences, The Hebrew University of Jerusalem, Jerusalem, Israel

<sup>2</sup>The Racah Institute of Physics, The Hebrew University of Jerusalem, Jerusalem, Israel

**Correspondence:** Guy Dagan (guy.dagan@mail.huji.ac.il)

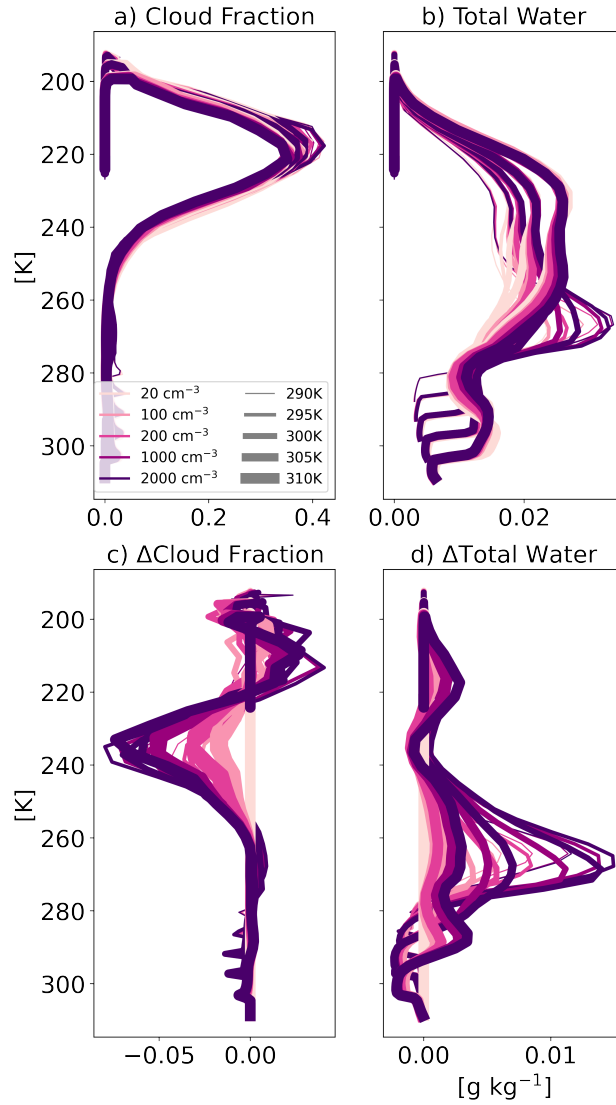

**Figure 1.** Domain and time mean vertical profiles of cloud fraction and total water in the cloud (**a** and **b**, respectively), and their response to an increase in  $N_a$  relative to the cleanest runs for each SST ( $N_a = 20 \text{ cm}^{-3}$ ; **c** and **d**, respectively).

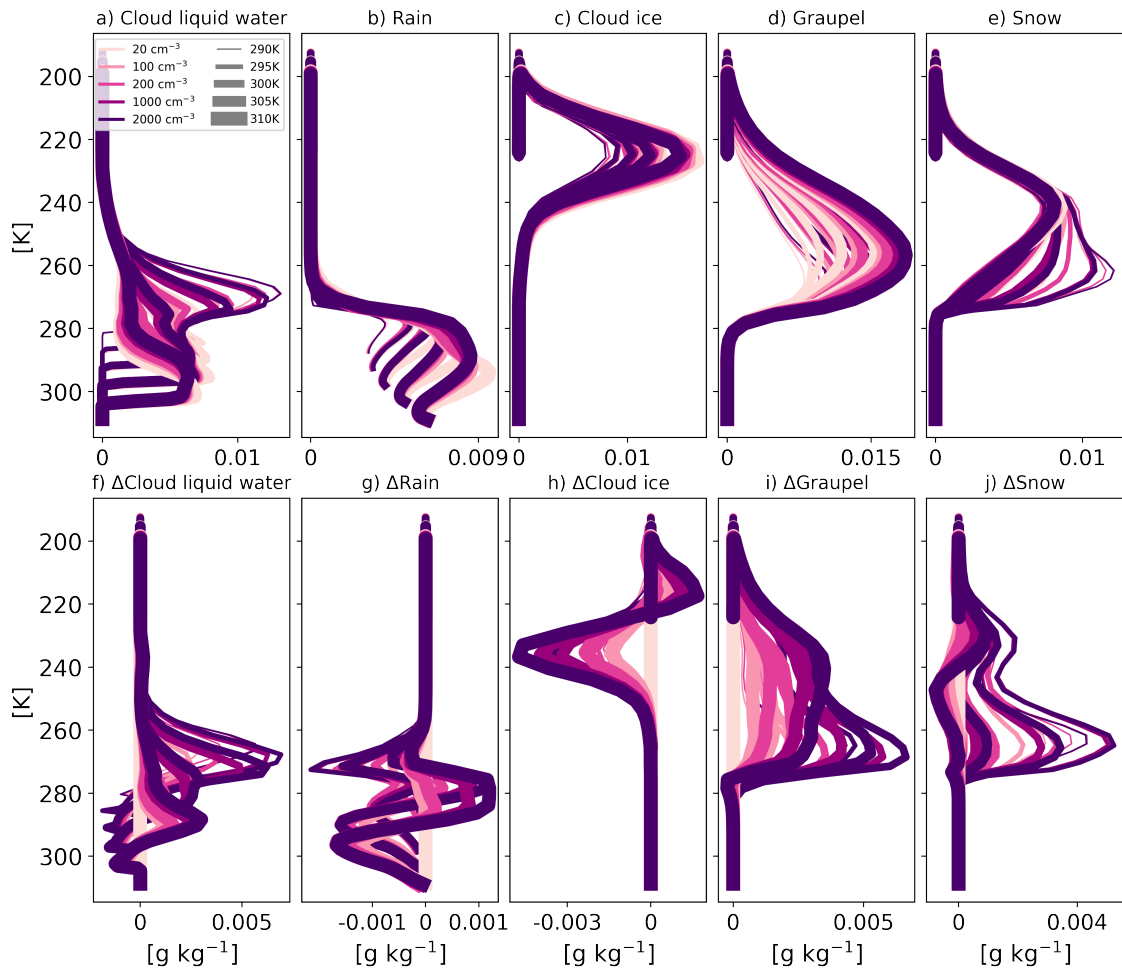

**Figure 2.** Domain and time mean vertical profiles of the different hydrometeors: **(a)** cloud liquid water, **(b)** rain, **(c)** ice, **(d)** graupel, and **(e)** snow, and their response to an increase in  $N_a$  relative to the cleanest runs for each SST ( $N_a = 20 \text{ cm}^{-3}$ ; **f** – **j**).

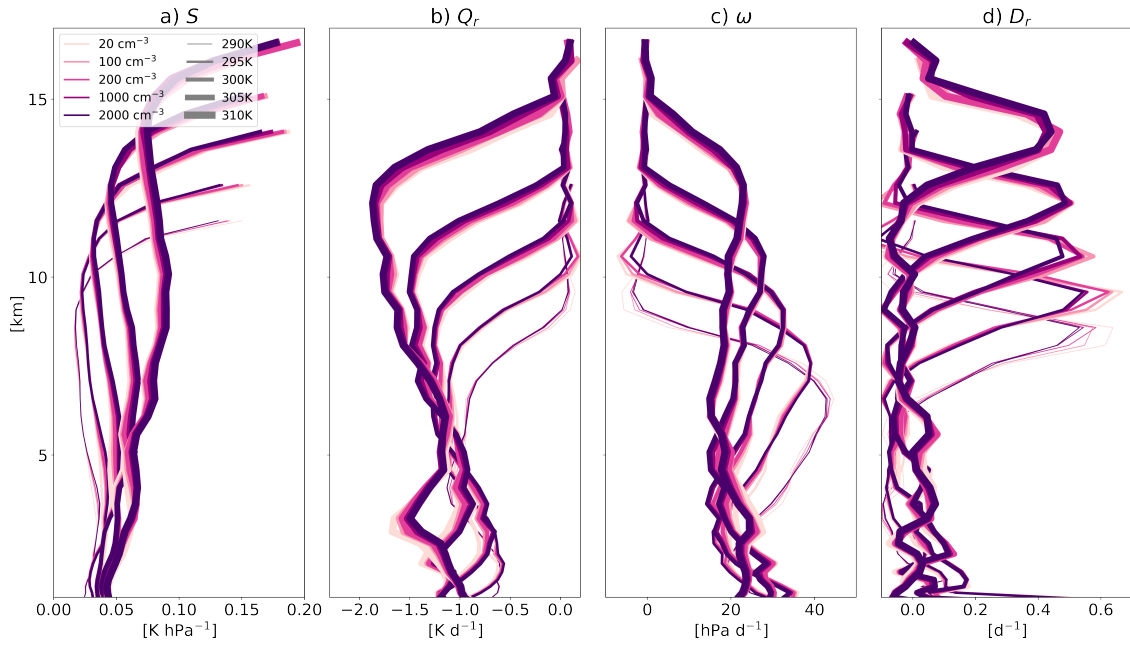

**Figure 3.** Domain and time mean vertical profiles of the: **a)** static-stability –  $S$ , **b)** radiative cooling rate –  $Q_r$ , **c)** vertical pressure velocity –  $\omega$ , and **d)** radiative-driven mass divergence –  $D_r$  for the different simulations conducted under different SSTs and  $N_a$  conditions.

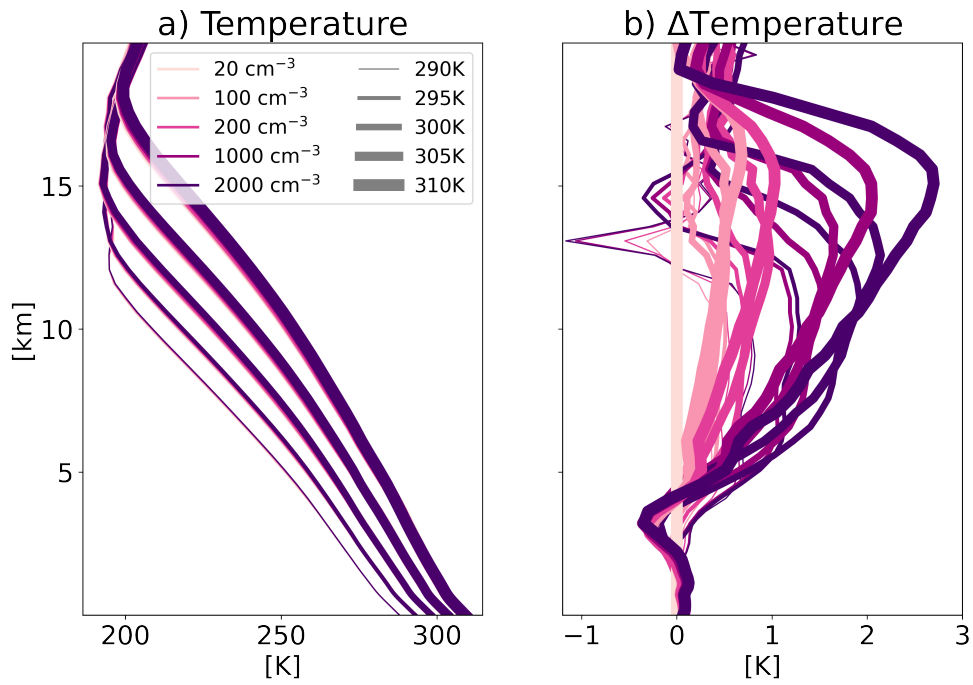

**Figure 4.** Domain and time mean vertical profiles of temperature (a) and its response to an increase  $N_\alpha$ , relative to the cleanest runs for each SST ( $N_\alpha = 20 \text{ cm}^{-3}$ ) (b)

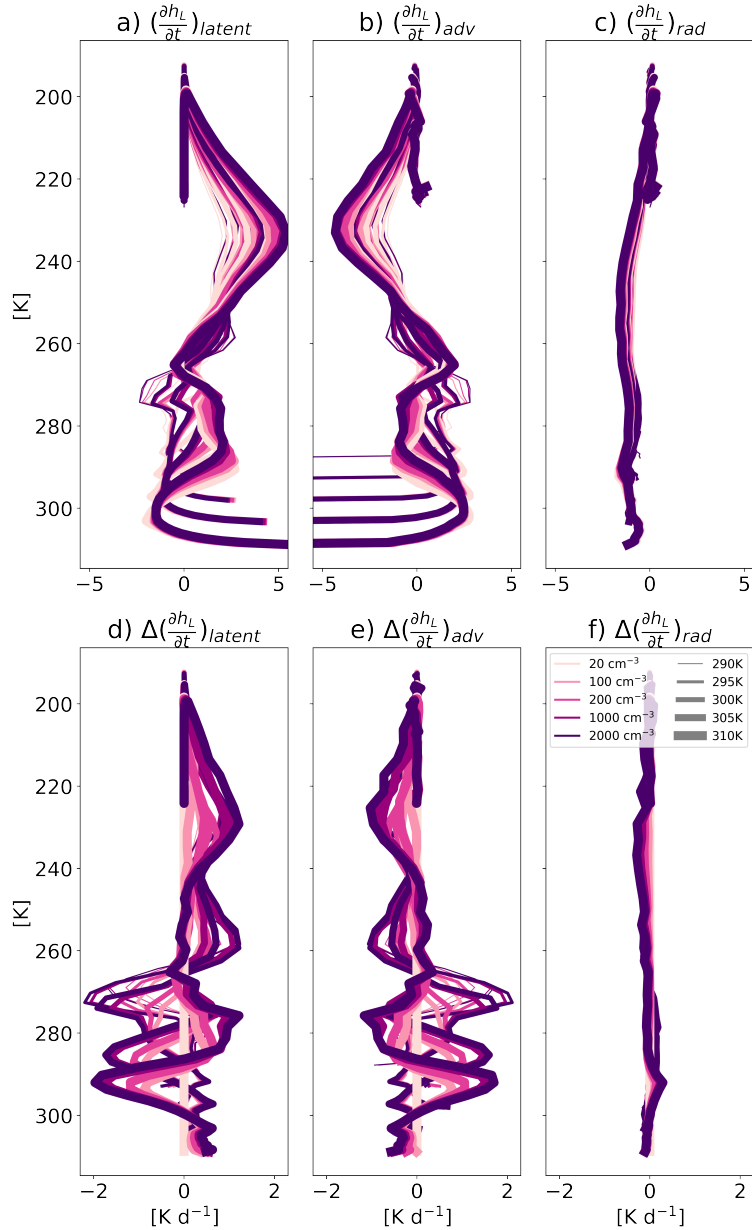

**Figure 5.** Vertical profiles of the domain and time mean tendency of the liquid/ice water static energy ( $h_L$ ) due to (a) latent heating, (b) advection, and radiation (c) in the different simulations conducted under different SST and  $N_a$ . Panels d – f presents the response of these terms to an increase in  $N_a$ , relative to the cleanest runs for each SST ( $N_a = 20 \text{ cm}^{-3}$ ).
